# Supplementary material for: Oenocarpus bacaba and Oenocarpus bataua Leaflets and Roots: A New Source of Antioxidant Compounds
Source: PubMed Central journal article supplement (PMC4964390; doi:10.3390/ijms17071014), 2016-06-27
Supplement: ijms-17-01014-s001.pdf [file ijms-17-01014-s001.pdf]

## Supplementary Materials: *Oenocarpus bacaba* and *Oenocarpus bataua* Leaflets and Roots: A New Source of Antioxidant Compounds

Louis-Jérôme Leba, Christel Brunschwig, Mona Saout, Karine Martial, Didier Bereau and Jean-Charles Robinson

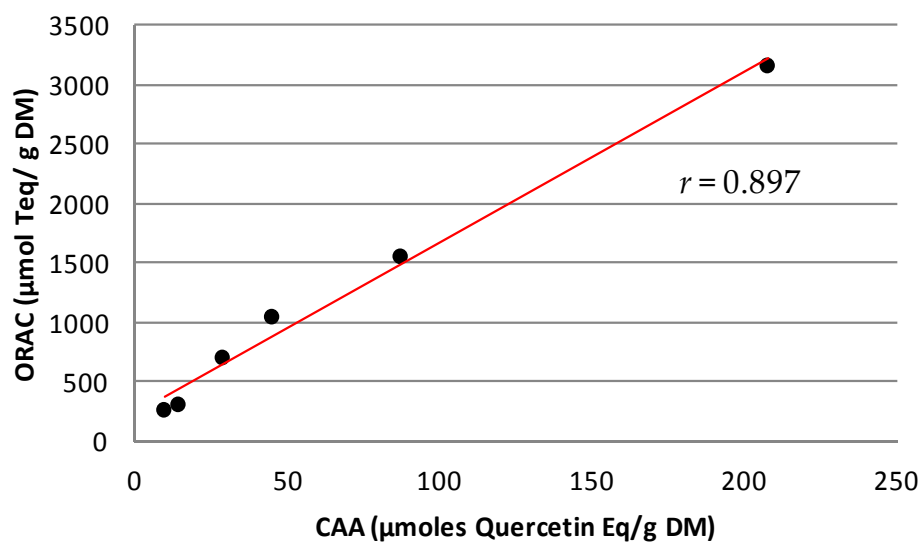

**Figure S1.** Correlation between ORAC and CAA activity. Correlations have been calculated using a Pearson's  $r$  correlation coefficient ( $p < 0.05$ ). n: 3 biological repetitions by palm species.

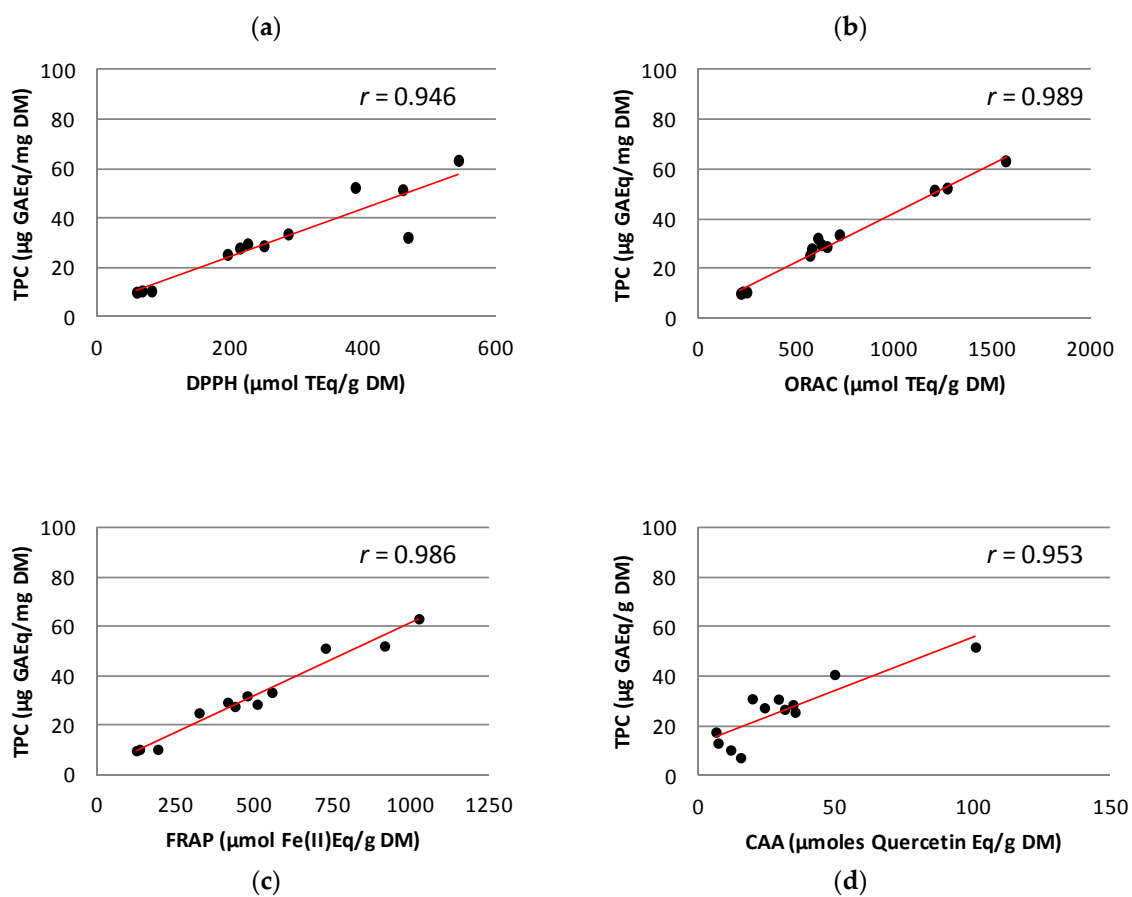

**Figure S2.** Correlations between Total Phenolic Content and, (a) DPPH, (b) FRAP, (c) ORAC (d) CAA of *O. bataua* and *O. bacaba* root and leaflet extracts. Correlations have been calculated using a Pearson's  $r$  correlation coefficient ( $p < 0.05$ ). n: 3 biological repetitions by palm species.

Table S1. Palm extracts classification.

| Classification               | TPC   |         |                      | DPPH  |         |                       | FRAP  |         |                       | ORAC  |         |                       |
|------------------------------|-------|---------|----------------------|-------|---------|-----------------------|-------|---------|-----------------------|-------|---------|-----------------------|
|                              | Organ | Extract | Content <sup>a</sup> | Organ | Extract | Activity <sup>b</sup> | Organ | Extract | Activity <sup>c</sup> | Organ | Extract | Activity <sup>d</sup> |
| <b>Poor extracts</b>         | R     | Obt-W   | 9,6                  | R     | Obt-W   | 60,9                  | R     | Obt-W   | 128                   | R     | Obt-W   | 218                   |
|                              | L     | Obt-W   | 10,1                 | L     | Obt-W   | 68,9                  | L     | Obt-W   | 138                   | L     | Obt-W   | 229                   |
|                              | R     | Obc-W   | 10,1                 | R     | Obc-W   | 83,3                  | R     | Obc-W   | 196                   | R     | Obc-W   | 248                   |
| <b>Intermediate extracts</b> | L     | Obt-M   | 24,9                 | L     | Obt-M   | 197,4                 | L     | Obt-M   | 327                   | L     | Obt-M   | 569                   |
|                              | R     | Obc-M   | 27,5                 | R     | Obc-M   | 215,9                 | R     | Obt-M   | 418                   | R     | Obc-M   | 579                   |
|                              | R     | Obc-A   | 28,4                 | R     | Obt-M   | 227,7                 | R     | Obc-M   | 441                   | L     | Obc-W   | 610                   |
|                              | R     | Obt-M   | 29,2                 | R     | Obc-A   | 252,3                 | L     | Obc-W   | 480                   | R     | Obt-M   | 627                   |
|                              | L     | Obc-W   | 31,8                 | R     | Obt-A   | 288,7                 | R     | Obc-A   | 512                   | R     | Obc-A   | 656                   |
|                              | R     | Obt-A   | 33,2                 | L     | Obc-M   | 389,7                 | R     | Obt-A   | 559                   | R     | Obt-A   | 720                   |
|                              | L     | Obt-A   | 51,1                 | L     | Obt-A   | 461                   | L     | Obt-A   | 729                   | L     | Obt-A   | 1203                  |
| <b>Good extracts</b>         | L     | Obc-M   | 52                   | L     | Obc-W   | 468,9                 | L     | Obc-M   | 917                   | L     | Obc-M   | 1268                  |
|                              | L     | Obc-A   | 63                   | L     | Obc-A   | 544,9                 | L     | Obc-A   | 1026                  | L     | Obc-A   | 1565                  |

Obt: *Oenocarpus bataua*; Obc: *Oenocarpus bacaba*; A: Acetone/water; M: Methanol/water; W: Water, R: Root; L: Leaflet; <sup>a</sup> Content in  $\mu\text{g}$  GAEq/mg DM; <sup>b</sup> Activity in  $\mu\text{mol}$  TEq/g DM; <sup>c</sup> Activity in  $\mu\text{mol}$  TEq/g DM; <sup>d</sup>  $\mu\text{mol}$  TEq/g DM. Classification have been performed using the reproducible hierarchical positioning of the extract in the 4 assays and their activity value.

**Table S2.** Total phenolic content and chemical activities (DPPH, FRAP, ORAC) of *Oenocarpus bataua*, *Euterpe oleracea* berries and green tea leaves.

| Extract        | Organ | Assay         | TPC                          | DPPH                         | FRAP                              | ORAC                         |
|----------------|-------|---------------|------------------------------|------------------------------|-----------------------------------|------------------------------|
|                |       | Palm          | ( $\mu\text{g GAEq/mg DM}$ ) | ( $\mu\text{mol TEq/g DM}$ ) | ( $\mu\text{mol Fe(II)Eq/g DM}$ ) | ( $\mu\text{mol TEq/g DM}$ ) |
| Water          | berry | Obt (1)       | 8.2 $\pm$ 0.5                | 32 $\pm$ 0.2                 | 137 $\pm$ 7.6                     | 166 $\pm$ 12.4               |
|                | leaf  | Green tea (1) | 99.5 $\pm$ 8.6               | 748 $\pm$ 51.9               | 1911 $\pm$ 81.6                   | 1348 $\pm$ 45.4              |
| Acetone/Water  | berry | Obt (1)       | 32.7 $\pm$ 5.8               | 235 $\pm$ 41.9               | 480 $\pm$ 85.5                    | 379 $\pm$ 67.5               |
|                |       | Obt (2)       | 32.2 $\pm$ 0.8               | 241 $\pm$ 12.9               | 706 $\pm$ 11                      | 170 $\pm$ 1.4                |
|                | leaf  | Eo (2)        | 38.7 $\pm$ 4.6               | 257 $\pm$ 22.5               | 503 $\pm$ 5.8                     | 453 $\pm$ 4.5                |
|                |       | Green tea (1) | 126.2 $\pm$ 2                | 1185 $\pm$ 33.9              | 2686 $\pm$ 106.8                  | 2167 $\pm$ 19                |
| Methanol/Water | berry | Obt (1)       | 30 $\pm$ 2.9                 | 201 $\pm$ 19.6               | 469 $\pm$ 45.9                    | 362 $\pm$ 35.5               |
|                | leaf  | Green tea (1) | 98.3 $\pm$ 8                 | 1045 $\pm$ 68.7              | 26775 $\pm$ 142.4                 | 2366 $\pm$ 30.6              |

Eo: *Euterpe oleracea*; Obt: *Oenocarpus bataua*; DM: Dry Mater; GAEq: Gallic acid equivalent; TEq: Trolox equivalent; Eq: equivalent. (1) data from Leba et al. (2014); (2) data from Rézairé et al. (2014).  $n = 3$  repetitions and error represent Standard Error of the Mean (SEM)
